1 **Seedling performance in a dioecious tree species is similar near female and male**  
2 **conspecific adults despite differences in colonization by arbuscular mycorrhizal fungi**

3

4 Jenalle L. Eck <sup>1,2,3\*</sup>, Camille S. Delavaux <sup>1,4</sup>, Dara M. Wilson <sup>2</sup>, Simon A. Queenborough <sup>1</sup> &

5 Liza S. Comita <sup>1,2</sup>

6

7 <sup>1</sup> Yale School of the Environment, New Haven, CT 06511, USA

8 <sup>2</sup> Smithsonian Tropical Research Institute, Balboa, Ancón, Republic of Panama

9 <sup>3</sup> Department of Evolution, Ecology and Organismal Biology, The Ohio State University,  
10 Columbus, OH 43210, USA

11 <sup>4</sup> Department of Environmental Systems Science, ETH Zurich, 8092 Zurich, Switzerland

12 \* Corresponding Author, Present Address: [jenalle.eck@ieu.uzh.ch](mailto:jenalle.eck@ieu.uzh.ch); Department of Evolutionary  
13 Biology and Environmental Studies, University of Zurich, 8057 Zurich, Switzerland

14

15 Keywords: Janzen-Connell hypothesis, plant-soil feedback, negative conspecific density

16 dependence, intraspecific variation, plant-mycorrhizal mutualism, seed production

17 **Abstract**

18 Patterns of seedling growth and survival near conspecific plants have important consequences for  
19 species diversity in plant communities, but the factors causing intraspecific variation in seedling  
20 performance are unclear. Greater seed production or size of adult plants could both drive the  
21 local accumulation of specialized antagonist species in the environment and affect conspecific  
22 seedling performance. Experiments with dioecious species, in which only female individuals  
23 produce seeds, decouple these factors in areas of high conspecific density. To assess whether  
24 conspecific seedling performance is reduced in the environments associated with seed-producing  
25 female trees relative to male or heterospecific trees, we conducted shadehouse and field  
26 experiments with a dioecious tropical tree species, *Virola surinamensis* (Myristicaceae), on  
27 Barro Colorado Island, Panama. The shadehouse experiment isolated the effect of soil microbial  
28 communities on seedling performance and allowed us to quantify colonization by mutualistic  
29 arbuscular mycorrhizal (AM) fungi, while the field experiment allowed us to assess seedling  
30 performance in a context that included the effects of nearby conspecific trees. Seedling biomass  
31 at the end of the 8-mo shadehouse experiment was similar between experimental plants exposed  
32 to soil microbial communities from underneath female conspecific, male conspecific, and  
33 heterospecific adult trees. However, seedling colonization by AM fungi was higher in male soil  
34 microbial communities. Similarly, at the end of the 7-mo field experiment, survival and biomass  
35 did not differ among experimental seedlings grown in female, male, and heterospecific  
36 environments (but biomass was reduced near larger conspecific adults). Together, our  
37 experiments did not support the hypothesis that conspecific seedling performance is reduced in  
38 female environments relative to male environments, despite reductions in colonization by  
39 mutualistic AM fungi in female soil microbial communities. Thus, intraspecific variation in the

- 40 biotic interactions between conspecific seedlings, established adults, and mutualist species may
- 41 not translate directly to patterns of tropical tree seedling survival.

## 42 **Introduction**

43           In many ecological communities, whether a given species recruits successfully depends  
44 on its identity and abundance, as well as the composition and traits of neighboring individuals,  
45 and has important ecological and evolutionary consequences. Recruitment is often suppressed by  
46 the density or proximity of conspecific neighbors (Janzen, 1970; Connell, 1971; Chesson, 2000),  
47 a form of negative conspecific density (or distance) dependence (CDD). This phenomenon has  
48 been demonstrated in a variety of plant ecosystems and may be caused by a combination of (i)  
49 the accumulation of host-specific natural enemies (reviewed by Carson & Schnitzer, 2008;  
50 Comita et al., 2014; Hülsmann et al., 2021; Song et al., 2021) or (ii) intraspecific competition for  
51 shared resources (Suzuki et al., 2003; Pujol & Mckey, 2005; Adler et al., 2018) in areas of high  
52 conspecific density. Patterns of negative CDD may be driven by plant–soil feedbacks between  
53 established plants and host-specific pathogenic soil microbes that negatively influence seedling  
54 performance (reviewed by Kulmatiski et al., 2008; van der Putten et al., 2013). Variation in  
55 negative CDD is often quantified among co-occurring plant species and attributed to differences  
56 in species’ life history strategies and related traits (Kobe & Vriesendorp, 2011; Lebrija-Trejos et  
57 al., 2016; Zhu et al., 2018; Jia et al., 2020; Zang et al., 2021), species relative abundance (Comita  
58 et al., 2010), or mycorrhizal associations (Bennett et al., 2017; Jiang et al., 2020; Jevon et al.,  
59 2022). Though experiments have shown that variation in seedling performance near conspecifics  
60 may also occur within species (Packer & Clay, 2003; Hood et al., 2004; Bell et al., 2006; Eck et  
61 al., 2019), the factors that contribute to intraspecific variation in conspecific neighbor effects are  
62 rarely studied (Freckleton & Lewis, 2006; but see Liu et al., 2015). Elucidating the factors  
63 causing variation in seedling recruitment and performance within species’ populations may allow

64 better predictions of how negative CDD influences important ecological and evolutionary  
65 dynamics in plant communities.

66       Variation in the composition and abundance of host-specific natural enemies in the soil  
67 near parent or other established plants is a prime driver of performance and recruitment success  
68 (Packer & Clay, 2003; Reinhart & Clay, 2009; Kotanen, 2010; Chanthorn et al., 2013; Liang et  
69 al., 2016; Chen et al., 2019). Despite this, the influence of variation among individuals (such as  
70 in genotype, size, or functional traits) on the local accumulation of natural enemies remains  
71 poorly understood. For example, differences in the fruit or seed crop could lead to variation in  
72 natural enemy abundance (Hubbell, 1980). Because of limited dispersal distances, many seeds  
73 fall beneath or close to parent trees (Swamy et al., 2011). The presence of conspecific seeds and  
74 seedlings has been shown to contribute to density-dependent mortality in tropical tree seedlings  
75 (Harms et al., 2000; Wright et al., 2005; Queenborough et al., 2007a; Comita et al., 2010; Metz  
76 et al., 2010; Lebrija-Trejos et al., 2014), presumably by increasing host-specific enemy densities  
77 (or competition among seedlings for shared resources; but see Paine et al., 2008). Thus, seed  
78 production is one potential factor that may impact enemy densities and/or conspecific seedling  
79 performance or recruitment near adult plants, though this hypothesis has rarely been tested (but  
80 see Hood et al., 2004).

81       Though the strength of negative CDD on performance and recruitment varies among life  
82 stages (Piao et al., 2013; Zhu et al., 2015), it is unclear whether the size and/or age of established  
83 plants influences conspecific seedling performance (Uriarte et al., 2004). Because larger  
84 individuals have older and more extensive root systems, higher pathogen densities or more  
85 specialized pathogen communities could accumulate in the soils near larger individuals. Because  
86 larger or older individuals may also be more fecund (Aarssen & Jordan, 2001), teasing apart the

87 effects of adult size from adult reproduction is challenging in many species. Dioecious plant  
88 species, in which male flowers that produce pollen and female flowers that produce seeds occur  
89 on separate individuals, offer the opportunity to decouple the effects of the size versus seed  
90 production of established plants on seedling performance in their soils.

91         The negative effects of variation in natural enemy conditions on seedling performance are  
92 well documented, but positive effects from mutualistic microbes (such as mycorrhizal fungi)  
93 may also influence patterns of seedling performance and CDD (Bever, 2002; Mangan et al.,  
94 2010a; Bachelot et al., 2015; Liang et al., 2015; Bachelot et al., 2017; Bennett et al., 2017; Jevon  
95 et al., 2022). For example, arbuscular mycorrhizal (AM) fungal association may help seedlings  
96 counter conspecific distance- and density-dependent mortality due to pathogens (Liang et al.,  
97 2015; Bachelot et al., 2017), via either increases in plant growth or nutritional status (Smith &  
98 Read, 2008; reviewed by Delavaux et al., 2017) or activation of plant defensive pathways  
99 (Newsham et al., 1995; Pozo & Azcón-Aguilar, 2007). Like enemies, the accumulation of  
100 mutualist species in soil is subject to host availability, and variation in mutualist-mediated CDD  
101 could result from variation in the size or seed production of nearby host individuals.

102         Despite recent evidence of intraspecific variation in CDD, the factors driving variation in  
103 conspecific seedling performance within plant populations remain unclear. To address this issue,  
104 we focused our study on a dioecious tropical tree species, isolating the effect of seed production  
105 on seedling performance from other potential factors in the vicinity of conspecifics. We  
106 conducted shadehouse and field experiments with *Virola surinamensis* (Myristicaceae) on Barro  
107 Colorado Island, Panama, to answer the following questions: 1) does seedling performance vary  
108 in the soil environment associated with female conspecifics versus soil associated with male  
109 conspecifics? 2) does the size or seed production of conspecific adults influence seedling

110 performance in their associated soil? and 3) does seedling colonization by mutualistic AM fungi  
111 vary between female and male soil environments? We hypothesized that: i) seedling performance  
112 would be reduced in the soil environments of female conspecifics, because repeated inputs of  
113 conspecific seeds and/or seedlings into female soils over time should cause greater accumulation  
114 of host-specific soil pathogens, ii) seedling performance would be reduced in the soil  
115 environments of larger conspecific trees, because their larger root systems will have accumulated  
116 higher densities of host-specific soil pathogens; iii) seedling performance would be reduced in  
117 the soil environments of conspecific trees that produce more seeds, because the input of greater  
118 numbers of conspecific seeds into the soil should increase the accumulation of host-specific  
119 pathogens, and iv) seedling colonization by AM fungi would be higher in female soils, because  
120 the repeated input of conspecific seeds and/or seedlings over time in their soils present host  
121 resources for AM fungal growth.

122         The shadehouse experiment allowed us to isolate the effect of soil microbial communities  
123 on seedling performance, while the field experiment allowed us to assess seedling performance  
124 in female and male conspecific environments in an ecologically relevant context. To investigate  
125 the factors influencing seedling performance more fully in conspecific soils, we quantified  
126 colonization by mutualistic AM fungi in the experimental seedlings, seed production by focal  
127 conspecific adults, and nutrient conditions in our experimental soil treatments. With this study,  
128 we aim to better understand the sources of intraspecific variation in plant–soil feedbacks and  
129 CDD, allowing better predictions of how these phenomena influence species diversity and  
130 evolution in plant communities.

131

132 **Materials and Methods**

133 **Study site and species**

134 Our study focused on *Virola surinamensis* (Rol. ex Rottb.) Warb. (Myristicaceae), a  
135 dioecious tropical tree species occurring on Barro Colorado Island (BCI), Republic of Panama  
136 (9°09' N, 79°51' W). BCI is a 15.6 km<sup>2</sup> moist tropical lowland forest (Croat, 1978) receiving  
137 ~2600 mm of rainfall per year (punctuated by a distinct dry season; Windsor, 1990). *Virola*  
138 *surinamensis* is native to tropical and subtropical wet lowland forests in Central America and  
139 Amazonia. It is a shade-tolerant (Howe, 1990), drought-sensitive (Fisher *et al.*, 1991) canopy  
140 tree, and occurs commonly in slope and stream habitats on BCI (Harms *et al.*, 2001).

141 The minimum reproductive size for *V. surinamensis* is ~ 30 cm diameter at 1.3 m above  
142 ground (DBH) (Riba-Hernández *et al.* 2014). Adult *V. surinamensis* are spatially aggregated  
143 (Condit *et al.*, 2000; Riba-Hernández *et al.*, 2014) but the sexes are distributed randomly relative  
144 to one another (Riba-Hernández *et al.* 2014). Flowers are fly-pollinated (Jardim & Mota, 2007).  
145 On BCI, flowering occurs in the dry season (~ Jan.) and seed production in the following wet  
146 season (~ July) (Zimmerman *et al.*, 2007). Seeds are large (~ 2 cm) and borne singly inside a  
147 heavy, inedible capsule: ~ 62 % of seeds are dispersed away from the maternal tree by animals  
148 (Howe & Vande Kerckhove, 1981). Herbivores predate many seeds and/or seedlings below  
149 maternal crowns, but seedlings experience higher survival if dispersed > 20 m away from the  
150 maternal tree (Howe, 1990).

151

152 **Soil inoculation shadehouse experiment**

153 To isolate the effect of soil microbes on the performance of seedlings near female and  
154 male conspecific trees, we conducted a soil microbial inoculation experiment in a shadehouse on  
155 BCI. Seeds were collected from beneath the canopy of 11 fruiting (female) *V. surinamensis* on



156 BCI during the peak of the species' fruiting in 2014 (between June – July). We also selected five  
157 reproductive-size male *V. surinamensis* (because flowers could not be sexed in the field,  
158 maleness was assumed because of lack of seed production during the study years, 2014 – 2016).  
159 All trees were 50 – 100 cm DBH and were located by exploring a ~ 3.5 km<sup>2</sup> area of BCI (see  
160 Fig. 1A for a map). Selected trees were located ~ 30 m to ~ 2 km apart. Seeds from each  
161 maternal source were surface-sterilized (10 % bleach for 1 m, rinse, 70 % ethanol for 30 s, rinse),  
162 air dried, and germinated in a shadehouse in autoclaved BCI soil (collected from the forest edge  
163 near the shadehouse). One-month post-germination, a minimum of 12 healthy seedlings per  
164 maternal seed source were randomly selected for inclusion in the experiment (more seedlings  
165 were selected if available).

166 We then collected samples of the soil microbial community beneath the canopy of each  
167 of the source trees to use as inocula in the experiment. To create one soil microbial inoculum per  
168 tree, we collected soil at a depth of 10 cm from three randomly-selected points within 3 m of  
169 each trunk (to roughly correspond to fine roots, where soil microbes are likely to be most active),  
170 then coarsely sieved and homogenized the soil from these three points. To act as a control, we  
171 also created soil microbial inocula from beneath the canopy of five reproductive-size  
172 heterospecific trees within the study area (Fig. 1A). Heterospecific trees (abbreviated as H1 –  
173 H5) were chosen to represent a range of common species and families (H1: *Spondias mombin* L.  
174 (Anacardiaceae); H2: *Ormosia macrocalyx* Ducke (Fabaceae); H3: *Anacardium excelsum*  
175 (Bertero & Balb. ex Kunth) Skeels (Anacardiaceae); H4: *Platypodium elegans* Vogel (Fabaceae);  
176 H5: *Protium tenuifolium* (Engl.) Engl. (Burseraceae)). Each seedling was assigned to the soil  
177 inoculum of only one of the 21 adult trees in the study (i.e., the 11 female conspecific trees, five  
178 male conspecific trees, or five heterospecific trees). Thus, seedlings from each maternal seed

179 source were assigned at random to each of three soil inoculum treatments: female conspecific  
180 soil inoculum ( $n = 144$  seedlings), male conspecific soil inoculum ( $n = 60$  seedlings), and  
181 heterospecific soil inoculum ( $n = 57$  seedlings). More seedlings were planted in female soil  
182 inoculum because the experiment was designed to test concurrently for the effect of relatedness  
183 on seedling performance in maternal soils (Eck et al., 2019). All soil inocula were collected in  
184 September 2014 and used in the experiment within two days.

185         In a shadehouse on BCI, 261 experimental seedlings were transplanted into individual 2-  
186 L pots in September 2014 (at ~ 1–2 mo of age). Each pot contained 20 % by volume of soil  
187 microbial inoculum from the seedling’s assigned tree and 80 % by volume of a common soil  
188 medium (a steam-sterilized 1:1 mixture of BCI field soil:potting sand). Inoculum was placed in  
189 the center of the potting medium in each pot using a ‘core’ method. Relatively small volumes of  
190 field soil inoculum were used to minimize the potential impact of differences in soil nutrients  
191 among inocula on seedling performance. Seedling pots were placed across four shadehouse  
192 benches in a balanced, randomized design (see Fig. 1B for a photograph of the shadehouse  
193 experiment). Shadehouse benches were covered with two layers of 80 % shade cloth (to mimic  
194 shady understory conditions) and were shielded from rainfall with a roof of clear plastic lining.  
195 Stem height, the number of leaves, and the length and width of each leaf were measured for each  
196 seedling immediately after transplant. Seedlings remained in their experimental treatments for ~  
197 8 mo and were amply watered three times per week. In May 2015, the 250 surviving seedlings  
198 were harvested. Final oven-dried biomass, stem height, leaf area, and foliar damage were  
199 measured for each seedling. Foliar damage was measured as the number of leaves showing any  
200 sign or symptom of disease or predation and the % damage by area was visually estimated on  
201 each damaged leaf. Initial oven-dried biomass was estimated for each experimental seedling

202 based on stem height at the time of transplant using an allometric model ( $F_{(1,42)} = 338.1$ ,  $p <$   
203  $0.001$ ,  $R^2 = 0.887$ ). Because dry biomass measurements require seedling harvest (and thus could  
204 not be obtained for actual experimental seedlings), this linear regression model was built based  
205 on measurements of height and dry biomass of a randomly harvested sample of potential  
206 experimental seedlings at the beginning of the experiment. Seedlings with missing initial or final  
207 biomass data were excluded from all models.

208 To quantify colonization by AM fungi in the surviving seedlings, we used the magnified  
209 root intersect method (McGonigle *et al.*, 1990) described in Eck *et al.* 2019. To test whether  
210 nutrient availability during the experiment varied among soil inocula or was linked to seedling  
211 performance, we also quantified soil nutrient conditions in each soil inocula at the end of the  
212 experiment using the method described in Eck *et al.* 2019. Finally, to explore the effect of the  
213 tree size and seed production of conspecific soil inoculum source trees on seedling performance  
214 in their soil microbial communities, we measured DBH and quantified seed production by the *V.*  
215 *surinamensis* trees providing soil inocula in the experiment using the method described in  
216 Queenborough *et al.* 2007b (see Supplementary Methods for details).

217

## 218 **Field experiment**

219 To test whether seedling performance was reduced beneath female conspecific trees  
220 relative to male conspecific and heterospecific trees in an ecologically-relevant setting, we  
221 conducted a field experiment in the BCI forest. We collected seeds from beneath the canopy of  
222 six female *V. surinamensis* during the June–July 2015 fruiting season. Because of seed  
223 availability and germination rates, two of the female trees from the shadehouse experiment were  
224 also used in the field experiment (V5 and V11). Additional females were located by exploring

225 the same ~ 3.5 km<sup>2</sup> area of BCI as in the shadehouse study (see Fig. 3A for a map). All five male  
226 *V. surinamensis* and four of the heterospecific trees studied in the shadehouse experiment were  
227 included in the field experiment (H2 was replaced with a new heterospecific tree, H6: *Sterculia*  
228 *apetala* (Jacq.) H. Karst). Seeds from each maternal source were surface-sterilized, air dried, and  
229 germinated in autoclaved BCI forest soil in a shadehouse under two layers of 80 % shadecloth.

230 One month post-germination, a minimum of 18 healthy seedlings per maternal seed  
231 source were randomly selected for inclusion in the field experiment. Within each seed source,  
232 seedlings were randomly assigned to one of three experimental field treatment groups: beneath a  
233 male conspecific adult, beneath a female conspecific adult, or beneath a heterospecific adult.  
234 Seedlings were randomly assigned to be transplanted beneath one adult tree within their  
235 treatment group, and into one of 3–6 seedling plots (1 m<sup>2</sup>) beneath the canopy of their assigned  
236 tree. Plot locations were randomized with respect to direction and distance from the base of the  
237 focal tree (1–4 m). Plots contained 3–5 experimental seedlings, each of which were randomly  
238 assigned to a 25-cm<sup>2</sup> position within the plot. Because the field experiment was designed to  
239 concurrently test for the effect of conspecific relatedness on seedling performance (Eck *et al.*,  
240 2019), female trees had, on average, more plots per tree and more seedlings per plot than male  
241 trees.

242 The 249 experimental seedlings were transplanted at ~ 1 mo of age into their field  
243 treatment plots. Immediately after transplant (August 2015), stem height, the number of leaves,  
244 and the length and width of each leaf were measured for each seedling. Each seedling was also  
245 stem-tagged with a unique identification number. All seedlings were censused every 1–2 mo,  
246 during which time survival was recorded, and the stem height and number of leaves were  
247 measured for all surviving seedlings. We also recorded instances of seedling stem breakage and

248 uprooting (likely caused by mammalian herbivores). Seedlings that disappeared (with or without  
249 their tags being found) were recorded as dead during the census of their disappearance. After ~ 7  
250 mo in the field experimental treatments (late March 2016), the 40 surviving seedlings were  
251 harvested and their total oven-dried biomass, stem height, and total leaf area were measured.

252

## 253 **Statistical analyses**

### 254 *Seedling performance in the shadehouse experiment*

255 To test whether seedling performance was reduced in female conspecific soil microbial  
256 communities relative to male and heterospecific soil microbial communities in the shadehouse  
257 experiment (Q1), we built a series of linear mixed-effects models (LMMs). We focused on  
258 growth (i.e., biomass) of seedlings that survived until the end of the experiment because survival  
259 rates in the experiment were high (95.8 %). First, we modelled seedling oven-dried biomass at  
260 harvest in all conspecific and heterospecific soils. Fixed effects in this model included soil  
261 microbial treatment (female conspecific, male conspecific, or heterospecific) and estimated  
262 initial seedling biomass. Maternal seed source, soil inoculum source, and shadehouse bench were  
263 included as crossed random effects.

264 Next, we tested whether seedling biomass at harvest was explained by the size of the  
265 conspecific tree whose soil microbial community the seedling was grown in (Q2). Because we  
266 only expect size to affect seedling performance in conspecific soils (due to the accumulation of  
267 host-specific microbes), we tested this using a separate LMM that excluded seedlings planted in  
268 heterospecific soils. Because dioecious species may increase in size without increasing in seed  
269 production, this allowed us to decouple tests of size from seed production (Fig. S2 & Table S1).  
270 Fixed effects in this model included the size (DBH) of the conspecific soil inoculum source and

271 estimated initial seedling biomass; maternal seed source, soil inoculum source, and shadehouse  
272 bench were included as crossed random effects. Then, we tested whether seedling biomass at  
273 harvest was explained by the amount of seed production by female conspecific trees (Q2) using a  
274 third LMM (excluding seedlings planted in male conspecific and heterospecific soils). Fixed  
275 effects in this model included a log-transformed estimate of the total number of seeds produced  
276 by the female conspecific soil inoculum source and estimated initial seedling biomass; maternal  
277 seed source, soil inoculum source, and shadehouse bench were included as crossed random  
278 effects.

279         To better investigate the factors contributing to seedling growth, we then analyzed  
280 whether seedling biomass at harvest was related to i) seedling colonization by AM fungi or ii)  
281 nutrient conditions in the soil inocula at the end of the experiment (Supplementary Methods). We  
282 also tested whether nutrient conditions at the end of the experiment varied among the female  
283 conspecific, male conspecific, and heterospecific soil microbial treatments (Supplementary  
284 Methods). As another measure of seedling performance, we tested whether seedling foliar  
285 damage was i) higher in female conspecific soil inocula (relative to male conspecific and  
286 heterospecific soil inocula) or ii) related to the size or seed production of the conspecific soil  
287 inoculum source (Supplementary Methods). All statistical analyses in our study were conducted  
288 in the R statistical environment (R Core Team 2022). All mixed-effects models in our study were  
289 constructed using the lme4 package (Bates et al., 2015). P values for LMM predictors were  
290 obtained using the lmerTest package (Kuznetsova et al., 2016).

291

292 *Seedling colonization by AM fungi*

293 To test whether seedling colonization by AM fungi in the shadehouse experiment was  
294 higher in female conspecific soil microbial inocula relative to male conspecific and  
295 heterospecific soil inocula (Q3), we built a generalized linear mixed-effects model (GLMM).  
296 The proportion of root intersects colonized by any AM fungal structure was modelled in each  
297 seedling that survived until the end of the shadehouse experiment using the glmmTMB package  
298 (Brooks et al., 2017). Fixed effects in this model included soil microbial treatment and estimated  
299 initial seedling biomass. To check whether patterns of AM fungal colonization were related to  
300 nutrient conditions in the soil inocula at the end of the experiment, we included soil nutrient  
301 conditions as a fixed effect in this model (Supplementary Methods). To account for potential  
302 variation between the two researchers that quantified AM fungal colonization in the seedlings,  
303 we also included observer as a fixed effect in the model. Random effects in the model included  
304 maternal seed source, soil inoculum source, and shadehouse bench. Model family was set to  
305 beta-binomial (to counter overdispersion) and weights were set to the number of root intersects  
306 quantified in each seedling.

307 Next, we tested whether seedling colonization by AM fungi was explained by the size of  
308 the conspecific soil inoculum source tree using a second GLMM. Fixed effects in this model  
309 included the size (DBH) of the conspecific soil inoculum source, estimated initial seedling  
310 biomass, observer, and soil nutrient conditions. Like in the model above, maternal seed source,  
311 soil inoculum source, and shadehouse bench were included as random effects. Finally, we tested  
312 whether seedling colonization by AM fungi was explained by the seed production of female  
313 conspecific soil inoculum sources using a third GLMM. Fixed effects in this model included a  
314 log-transformed estimate of the total number of seeds produced by the female soil inoculum  
315 source, estimated initial seedling biomass, observer, and soil nutrient conditions. Random effects

316 in this model included maternal seed source, soil inoculum source, and shadehouse bench.  
317 Because preliminary analyses using the proportion of root intersects colonized by arbuscules  
318 yielded similar results, we focus here on analyses utilizing data on all visible AM fungal  
319 structures. P values for GLMM predictors were obtained using the car package (Fox &  
320 Weisberg, 2019).

321

### 322 *Seedling performance in the field experiment*

323 To test whether seedling performance in the field was reduced in female conspecific  
324 environments relative to male conspecific and heterospecific environments, we built a series of  
325 mixed-effects models analyzing seedling survival and growth. First, the survival of seedlings in  
326 all conspecific and heterospecific environments was modelled at the end of the field experiment  
327 as a binary response variable using a GLMM (with family set to binomial). Because including  
328 seedlings that were damaged in the field (likely by mammalian herbivores) did not affect the  
329 results of the model, we included whether a seedling experienced stem breakage and/or  
330 uprooting (at any point during the field experiment) as a binary fixed effect in the model.  
331 Additional fixed effects in the model included field environment (female conspecific, male  
332 conspecific, or heterospecific) and estimated initial seedling biomass. Maternal seed source and  
333 the identity of the adult tree each seedling was planted near were included as random effects.

334 Next, we tested whether seedling survival was explained by the size (DBH) of the  
335 conspecific adult they were planted near using a separate GLMM (excluding seedlings in  
336 heterospecific field environments). Estimated initial seedling biomass and whether a seedling  
337 was damaged by mammalian herbivores were also included as fixed effects in this model, while  
338 maternal seed source and focal adult identifier were included as random effects. Because the



339 number of experimental seedlings varied among field plots, we also included the number of  
340 experimental seedlings in the plot as a fixed effect in this model (this factor could not be  
341 included in the previous model because it was correlated with field environment). In preliminary  
342 analyses, we included the exact distance between the seedling and the focal adult (in m) as a  
343 fixed effect; because seedling performance was not related to the distance to the focal adult at  
344 this small spatial scale (within 1 – 4 m of the trunk and beneath the canopy), this factor was  
345 removed from all final field models.

346         As another measure of seedling performance in the field, we then tested whether the  
347 biomass of the seedlings that survived until the end of the field experiment varied among female  
348 conspecific, male conspecific, and heterospecific field environments. First, we modelled the  
349 oven-dried harvest biomass of the seedlings that survived until the end of the experiment in all  
350 conspecific and heterospecific environments using a LMM. Explanatory factors in the model  
351 included field environment (female conspecific, male conspecific, or heterospecific), estimated  
352 initial seedling biomass, and whether the seedling was damaged by mammalian herbivores.  
353 Maternal seed source and the identity of the focal adult each seedling was planted near were  
354 included as random effects. Finally, we tested whether seedling biomass was explained by the  
355 size of the conspecific adult they were planted near using a separate LMM (excluding seedlings  
356 in heterospecific field environments). Explanatory factors in the model included the DBH of the  
357 conspecific adult, estimated initial seedling biomass, seedling damage by mammalian herbivores,  
358 and the number of experimental seedlings in the field plot. Like in the model above, maternal  
359 seed source and focal adult identifier were included as random effects in the model.

360

361 **Results**

## 362 **Seedling performance in the shadehouse experiment**

363           At the end of an 8-mo shadehouse experiment, we found that *V. surinamensis* seedlings  
364 grown in a soil microbial community associated with a female conspecific tree had similar  
365 biomass as seedlings grown in a soil microbial community associated with a male conspecific  
366 tree or a heterospecific tree (Fig. 1C & Table S2;  $F = 0.87$ ,  $p = 0.44$ ;  $n = 246$  seedlings).  
367 Seedlings grew substantially during the experiment: the average biomass of seedlings at the end  
368 of the experiment was  $2.58 \pm 1.08$  g versus an estimated  $0.40 \pm 0.14$  g at the beginning of the  
369 experiment. We also did not find a relationship between seedling biomass and the size (Fig. 1D  
370 & Table S3;  $F = 0.32$ ,  $p = 0.59$ ,  $n = 184$  seedlings) of the conspecific soil inoculum source, or the  
371 number of seeds produced by female conspecific soil inoculum sources (Fig. 1E & Table S4;  $F =$   
372  $1.75$ ,  $p = 0.23$ ,  $n = 130$  seedlings). Soil nutrient conditions at the end of the experiment were  
373 similar among seedlings grown in the female conspecific, male conspecific, and heterospecific  
374 soil microbial treatments (Fig. S4 & Table S5;  $F = 0.98$ ,  $p = 0.40$ ,  $n = 21$  soil inocula), and we  
375 did not find a relationship between seedling biomass and nutrient conditions in the soil inocula  
376 (Fig. S5 & Table S6;  $F = 2.12$ ,  $p = 0.16$ ;  $n = 246$  seedlings). Similarly, we found that the  
377 incidence of seedling foliar damage was not affected by the soil microbial treatment (Fig. S6 &  
378 Table S7;  $p = 0.82$ ;  $n = 241$  seedlings), nor related to the size of the conspecific soil inoculum  
379 source (Fig. S7A & Table S8;  $p = 0.45$ ,  $n = 184$  seedlings) or seed production by female  
380 conspecific trees (Fig. S7B & Table S9;  $p = 0.35$ ;  $n = 130$  seedlings).

381

## 382 **Seedling colonization by AM fungi**

383           Most of the seedlings (82.5 %) were colonized by AM fungi after 8-mo of growth in the  
384 shadehouse experiment. We found that seedlings grown in a soil microbial community associated

385 with a male conspecific tree had higher proportions of colonization by AM fungi in their roots  
386 than seedlings grown in a soil microbial community associated with a female conspecific tree or  
387 a heterospecific tree (Fig. 2A & Table S10;  $p = 0.04$ ;  $n = 230$  seedlings). This result was  
388 consistent across soil inoculum sources: in four out of the five male *V. surinamensis* trees in our  
389 study, the predicted mean proportions of seedling colonization by AM fungi were higher than the  
390 means predicted for any of the 11 female *V. surinamensis* trees (Fig. 2B). We found that seedling  
391 colonization by AM fungi was not related to the size of the conspecific tree providing the soil  
392 inocula (Fig 2C & Table S11;  $p = 0.37$ ;  $n = 174$  seedlings) or the number of seeds produced by  
393 female conspecific soil inoculum source trees (Fig. 2D & Table S12;  $p = 0.55$ ;  $n = 121$   
394 seedlings). We did not find a relationship between seedling biomass and seedling colonization by  
395 AM fungi at the end of the experiment (Fig. S8 & Table S13;  $F = 0.91$ ,  $p = 0.34$ ;  $n = 230$   
396 seedlings). We found a marginally significant effect of nutrient conditions in the female  
397 conspecific soil inocula at the end of the experiment on seedling colonization by AM fungi in  
398 those inocula (Table S12;  $p = 0.08$ ;  $n = 121$  seedlings).

399

#### 400 **Seedling performance in the field experiment**

401 At the end of the field experiment (Figs. 3A & 3B), we found that seedling survival was  
402 similar among seedlings planted in female conspecific environments, male conspecific  
403 environments, and heterospecific environments in the field (Fig. 3C & Table S14;  $p = 0.79$ ;  $n =$   
404 249 seedlings). Seedling mortality was high with only 16.1 % of the experimental seedlings alive  
405 after 7 mo. We found a marginally significant positive effect of the size of the conspecific tree  
406 the seedling was planted near on seedling survival (Fig. 3D & Table S15;  $p = 0.08$ ,  $n = 198$   
407 seedlings). In contrast, we found that seedlings in field plots that contained higher densities of

408 experimental seedlings at the beginning of the experiment had lower survival (Fig. 3E & Table  
409 S15;  $p = 0.01$ ;  $n = 198$  seedlings).

410 As with survival, the harvest biomass of seedlings that survived until the end of the field  
411 experiment was similar among female conspecific, male conspecific, and heterospecific field  
412 environments (Fig. 4A & Table S16;  $F = 1.05$ ,  $p = 0.38$ ;  $n = 40$  seedlings). We found a  
413 significant negative effect of the size of the conspecific tree the seedling was planted near on  
414 seedling biomass in the field (Fig. 4B & Table S17;  $F = 5.14$ ,  $p = 0.05$ ;  $n = 32$  seedlings).  
415 Seedling biomass at the end of the field experiment was not related to the initial density of  
416 experimental seedlings in the field plots (Table S17;  $F = 2.95$ ,  $p = 0.11$ ;  $n = 32$  seedlings).

417

## 418 **Discussion**

419 Though recent studies have focused on quantifying patterns of CDD among co-occurring  
420 species and determining whether such patterns are caused primarily by natural enemies,  
421 mutualists, or competition with neighbors (Chanthorn et al., 2010; Kotanen, 2010; Lebrija-Trejos  
422 et al., 2014), less is known about the patterns and causes of intraspecific variation in conspecific  
423 seedling performance. In parallel shadehouse and field experiments with a dioecious tropical tree  
424 species in Panama, we examined variation in conspecific seedling performance beneath  
425 established conspecific adult trees and tested whether seedling growth and survival were  
426 negatively impacted by seed input or size of the conspecific adult and whether such effects were  
427 mediated by soil microbes. We did not find evidence in support of the hypothesis that seed  
428 production by female trees decreases seedling performance in female soils. In the field and in the  
429 shadehouse, seedling survival and growth were similar among seedlings grown in female  
430 conspecific, male conspecific, and heterospecific soils. However, unexpectedly, seedling

431 colonization by AM fungi was more frequent in the roots of seedlings grown in male soils than  
432 in the roots of seedlings grown in female or heterospecific soils. Together, our results suggest  
433 that though plant–mycorrhizal interactions differ between seedlings in male and female soils,  
434 these differences do not necessarily translate to differences in seedling growth or survival.

435         Traits that vary among individuals within populations are often overlooked in community  
436 ecology but are an important source of intraspecific variation in ecological dynamics (Freckleton  
437 & Lewis, 2006). In our study, we asked whether intraspecific variation in factors such as size or  
438 seed production of established plants could underlie variation in the performance of conspecific  
439 seedlings in their soils. Though we hypothesized that variation in seed production by adult trees  
440 would cause variation in the accumulation of host-specific natural enemies, and consequently,  
441 variation in conspecific seedling performance in their environments, we did not find evidence in  
442 support of this hypothesis. Seedling survival, growth, and leaf damage in conspecific soils were  
443 independent of the amount of seeds produced by females and of the stark contrast in seed  
444 production between male and female adults of the species. In a shadehouse experiment with  
445 another dioecious tropical tree species in Ghana, Hood et al. (2004) found reductions in survival  
446 and higher disease incidence for seedlings grown in female relative to male soils, indicating that  
447 such differences may occur in other species. Because we did not quantify enemy densities in our  
448 study, we cannot rule out the possibility that seed production could cause short- or long-term  
449 changes to the density or composition of natural enemy communities near established plants.  
450 However, our study suggests that any such changes, if they occur, do not have a strong influence  
451 on conspecific seedling performance in our study species. Effects of seed production on  
452 conspecific seedling performance via natural enemies (or mutualists) could still occur in other  
453 species, emerge over longer time periods or during later developmental stages, or could be

454 critically determined during or immediately after seed germination. In contrast, we found that  
455 increases in the number of experimental conspecific seedlings in our field plots negatively  
456 affected seedling survival, in line with other studies showing the importance of conspecific  
457 seedling neighbors in determining seedling performance (Harms et al., 2000; Queenborough et  
458 al., 2007a; Comita et al., 2010; Metz et al., 2010; Lebrija-Trejos et al., 2014).

459         We also asked whether the size of established conspecifics might influence the  
460 performance of conspecific seedlings in their soils. By studying a dioecious species, we were  
461 able to decouple the influences of size and seed production, because male trees are as large as  
462 females but do not produce fruit. In the field, we found some effects of the size of the conspecific  
463 adult a seedling was growing near on its survival. Specifically, seedling survival was slightly  
464 higher in the soils of larger conspecific trees relative to smaller ones. In contrast, seedling growth  
465 was reduced in the soils of larger conspecific trees relative to smaller ones. Growth–defense  
466 tradeoffs are common in plants (reviewed by Huot et al., 2014); together, these findings could  
467 indicate a tradeoff in which seedlings in the soils of larger conspecific adults invest energetic  
468 resources in defense (thus aiding survival), while divesting resources away from growth. This  
469 could occur if natural enemy conditions are more limiting in the soils of larger conspecific adults  
470 relative to smaller ones. However, we did not observe any effects of conspecific tree size in the  
471 shadehouse experiment, suggesting that any differences in seedling performance due to  
472 conspecific size are not caused by soilborne microbes. Thus, such effects may be driven by other  
473 types of host-specific enemies (e.g., foliar pathogens or insect herbivores) or stronger  
474 competition for resources near larger adult trees. Future studies that quantify enemy abundances  
475 and seedling–enemy interactions, as well as resource competition, in the environments of

476 conspecific trees that vary in size are necessary to conclude whether adult size is an important  
477 factor influencing conspecific seedling performance.

478       Plant genotype and the level of genetic relatedness between seedlings and nearby adults  
479 may also influence seedling performance in conspecific soils (Browne & Karubian, 2016; Eck et  
480 al., 2019). In our study species, shadehouse seedlings that were grown in the soil microbial  
481 community associated with their maternal tree had lower biomass than seedlings that were grown  
482 in the soil microbial community of an unrelated conspecific female adult (Eck et al., 2019). This  
483 finding demonstrates that the shadehouse experimental approach utilized in our study is capable  
484 of detecting differences in conspecific soil effects. Together, these shadehouse results suggest  
485 that genetic relatedness to the seedling, rather than the size or seed production of nearby adults,  
486 determines the effect of conspecific soil microbial communities on seedling performance. Lack  
487 of differences in seedling growth between male and female conspecific soil microbial inoculum  
488 sources in our study could be because i) we did not account for relatedness of the soil donor tree  
489 to the focal seedling and ii) the soil donor trees likely had varying levels of relatedness to the  
490 experimental seedlings. In addition, though negative plant-soil feedbacks have also been  
491 documented in our study species (Mangan et al., 2010b), we did not find differences between *V.*  
492 *surinamensis* seedling performance in conspecific soils versus heterospecific soils in our study.  
493 However, because plant-soil feedbacks arise from pairwise interactions between co-occurring  
494 species (rather than from comparisons of the performance of one species in conspecific versus  
495 heterospecific soils), our result does not necessarily contradict prior studies demonstrating  
496 negative plant-soil feedbacks in *V. surinamensis*. Thus, host-specific soil-borne pathogens could  
497 still be a key factor determining seedling performance in our study species. Furthermore, a study  
498 of a subtropical tree community at the Heishiding Nature Reserve in China found a positive

499 relationship between the density of conspecific adults and soil pathogens that led to higher  
500 conspecific seedling mortality (Liang et al., 2016); thus, the density of conspecific adults may  
501 have a larger effect on enemy densities than the size or seed production of just the nearest  
502 conspecific adult.

503 Mutualistic AM fungi are also thought to be important in influencing CDD and seedling  
504 performance (Bever, 2002; Mangan et al., 2010b; Bachelot et al., 2015; Liang et al., 2015;  
505 Bachelot et al., 2017; Bennett et al., 2017; Jevon et al., 2022). We hypothesized that the repeated  
506 input of conspecific seeds and/or seedlings near female trees would result in more opportunities  
507 for the growth of AM fungi, and subsequently, higher colonization rates by AM fungi in  
508 seedlings grown in female conspecific soils relative to male soils. Contrary to our expectations,  
509 colonization by AM fungi was higher in seedlings grown in male conspecific soils relative to  
510 female conspecific soils. This result suggests that another mechanism may be affecting AM  
511 fungal abundance, such as the release of AM fungal growth (or seedling association with AM  
512 fungi) in male soils from pathogen suppression in female soils (or other constraints). Though  
513 nutrient conditions were similar among seedlings grown in female and male soil inocula at the  
514 end of the experiment, nutrient conditions were more strongly linked to AM fungal colonization  
515 rates in female soils than in conspecific soils in general. In the dioecious tropical tree *Milicia*  
516 *regia* (Moraceae), Hood et al. (2004) found differences in AM fungal colonization depending on  
517 whether seedlings were grown in conspecific versus distant soils, but not between female versus  
518 male soils, suggesting that these dynamics could vary among plant species. In addition, in our  
519 study differences in AM fungal colonization did not translate to differences in seedling  
520 performance in the soil microbial communities associated with male conspecific versus female  
521 conspecific trees. Though negative impacts of the soil microbial communities near adults on



522 conspecific seedlings appear to be more common than positive impacts, especially in AM fungal-  
523 associated trees (Mangan et al. 2010a, Liu et al. 2012, McCarthy-Neumann & Ibáñez 2013,  
524 Bennett et al. 2017, Eck et al., 2019), AM fungal benefits to seedlings are strong enough to  
525 balance the negative impact of host-specific pathogens in at least some tree species (Mangan et  
526 al., 2010b; Liang et al. 2015). Because AM fungal-associating tree species tend to show stronger  
527 negative CDD than EM fungal-associating tree species (Jiang et al., 2020; Delavaux et al., *in*  
528 *prep.*), this could indicate that the impact of AM fungi are relatively weak in these systems.

529         The advantages and disadvantages of the dioecious reproductive system and how  
530 dioecious species are maintained in plant communities is an important topic of current research  
531 (Bruijning et al., 2017). Our study adds to this discussion by suggesting that male environments  
532 may provide some advantages over female environments for conspecific seedlings, mainly in  
533 colonization by mutualist AM fungi. Sex ratios in dioecious tree species tend to be male-biased  
534 (Queenborough et al., 2007b), though the sex ratio is uniform in *V. surinamensis* (Riba-  
535 Hernandez et al. 2014). The distributions of adult *V. surinamensis* are aggregated, with males  
536 and females occurring equally frequently within patches (Riba-Hernandez et al., 2014). In our  
537 study, AM fungal colonization in the soil inocula of female conspecific trees was not related to  
538 the quantity of seeds the female produced. This indicates that the influence of seed production on  
539 seedling-AM fungal dynamics in adult soils is likely more qualitative, i.e., related to broader  
540 qualities that may differ among female and male environments, rather than quantitative, i.e.,  
541 related specifically to variation in the quantity of seeds produced. In the context of dioecy, higher  
542 colonization by AM fungi (or other mutualist advantages) in some conspecific sites could cause  
543 reductions in negative CDD within species and act as a selection force on species coexistence  
544 (Montesinos et al., 2007). However, because we did not find differences in seedling growth or

545 survival near male and female trees, our study suggests overall tolerance of seedlings to female  
546 seed production (and any associated environmental changes). This tolerance could help seedlings  
547 withstand any potentially negative impacts of aggregated seed production (e.g., higher enemy  
548 densities).

549         The causes and consequences of interspecific and intraspecific variation in negative CDD  
550 continue to be an important area of future research (Comita & Stump, 2020). The demographic  
551 patterns predicted by Janzen (1970) and Connell (1971) have been shown to occur in a variety of  
552 plant communities worldwide (reviewed by Carson & Schnitzer 2008; Terborgh, 2011; Comita  
553 et al., 2014), and theoretical studies demonstrate that they can enhance local species richness  
554 (Adler & Muller-Landau, 2005; but see Stump & Comita, 2018) and structure the relative  
555 abundance of species in plant communities (Mangan et al., 2010b). Recently, studies expanding  
556 on the Janzen–Connell hypothesis to consider intraspecific effects within populations and have  
557 found that within-species variation may also contribute to the maintenance of species diversity  
558 and the evolution of plant traits, such as seed dispersal (Schupp et al., 1992; Liu et al., 2015;  
559 Browne & Karubian, 2016; Marden et al., 2017; Eck et al., 2019). Variation in conspecific  
560 seedling survival due to variation in plant-enemy or plant-mutualist interactions within species  
561 could help to enhance plant species diversity by enabling species to differ in the distributions of  
562 their responses to the environment (Clark, 2010). Our study does not provide evidence of  
563 variation in negative CDD within species, but instead shows variation in biotic interactions  
564 between conspecific seedlings and adults and mutualists. Intraspecific variation in negative  
565 conspecific effects was not explained by differences in seed inputs or size of established  
566 conspecific adults. Understanding the factors that influence conspecific seedling survival near

567 adult plants will help us better understand how natural enemies and mutualists structure plant  
568 diversity and abundance.

569 **Figures**

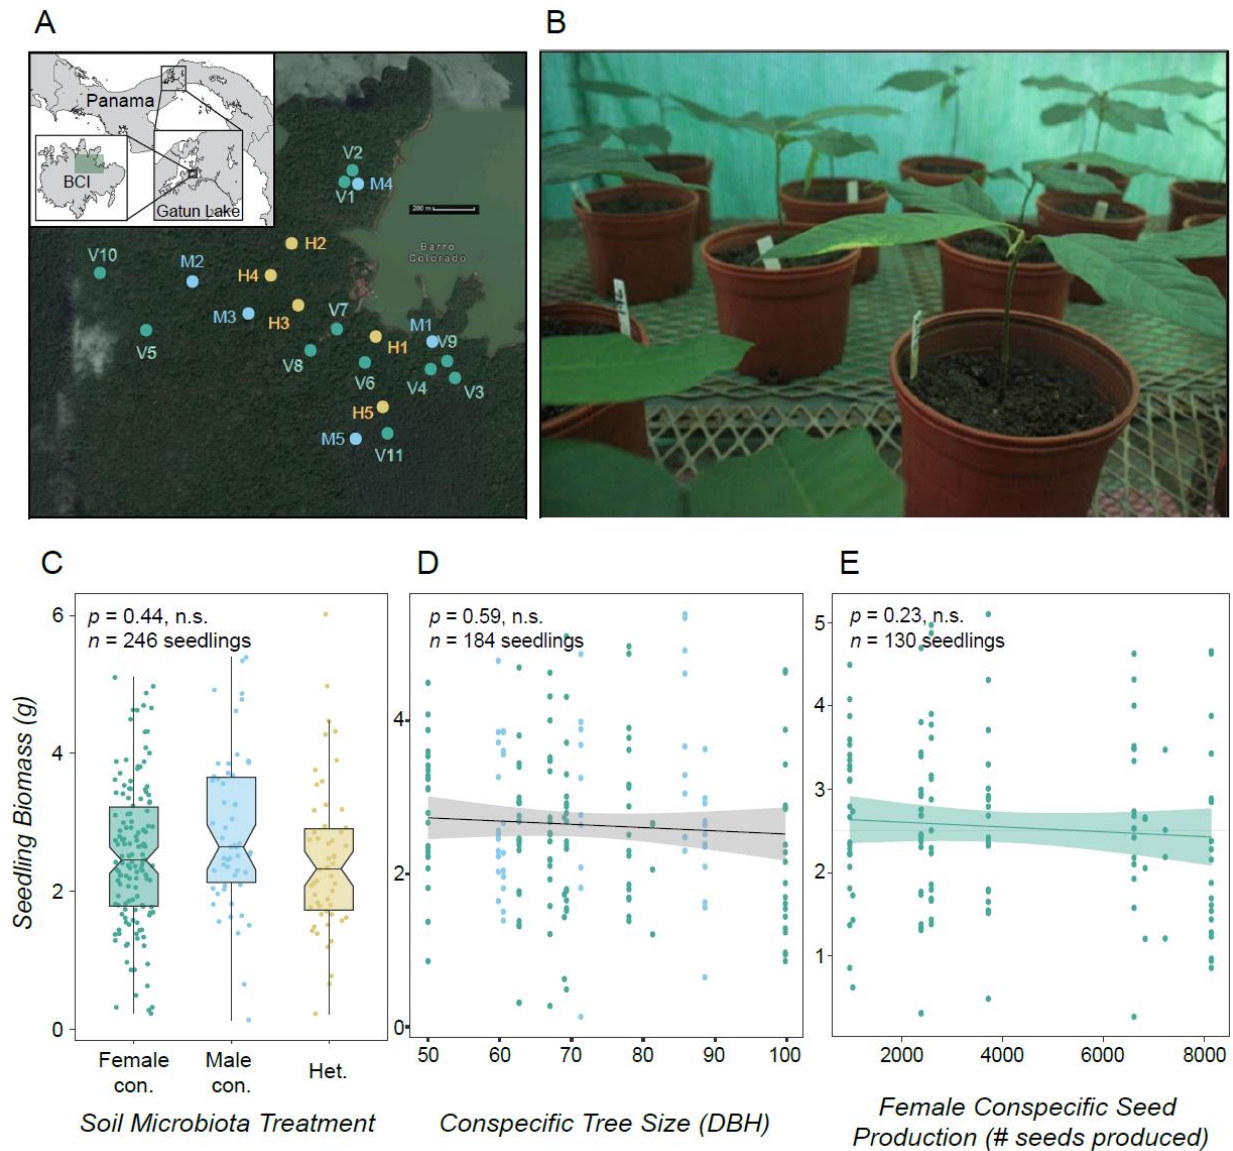

570

571 **Figure 1: In a shadehouse experiment, seedling biomass was similar in female conspecific**  
572 **and male conspecific soil microbial communities.** Panel A: *Virola surinamensis* and  
573 heterospecific trees used as soil inoculum sources in the shadehouse experiment are located on  
574 Barro Colorado Island (BCI), Panama (the study area is shaded in green on the BCI map).  
575 Female *V. surinamensis* are marked in green (V1 - V15), male *V. surinamensis* in blue (M1 -  
576 M5), and heterospecific trees in yellow (H1 - H5). Map data: Google, ©2017. Map inset  
577 modified from Baldeck *et al.*, 2014. Panel B: In a shadehouse on BCI, we planted *V.*  
578 *surinamensis* seedlings in three soil microbial community inoculation treatments: female  
579 conspecific soil, male conspecific soil, or heterospecific soil. Panel C: At the end of the 8-mo  
580 shadehouse experiment, the biomass of *V. surinamensis* seedlings grown in the soil microbial  
581 community associated with female conspecific trees was similar to seedlings grown in the soil  
582 microbial community associated with male conspecific trees or heterospecific trees (Table S2).

583 *Panel D*: Seedling biomass at the end of the shadehouse experiment was not related to the size of  
584 the conspecific tree whose soil microbial community the seedlings were grown in (*Panel D*;  
585 Table S3) or the amount of seed production by the female conspecific tree whose soil microbial  
586 community the seedlings were grown in (*Panel E*; Table S4). In *C*, box belts show the median  
587 values, box notches represent a 95 % confidence interval for comparing medians, box hinges  
588 correspond to the first and third quartiles, and box whiskers extend to the largest and smallest  
589 value no further than  $1.5 \times$  the interquartile range from the hinges. In *D* & *E*, shaded areas  
590 represent 95 % confidence interval bands surrounding the best fit regression lines.

591

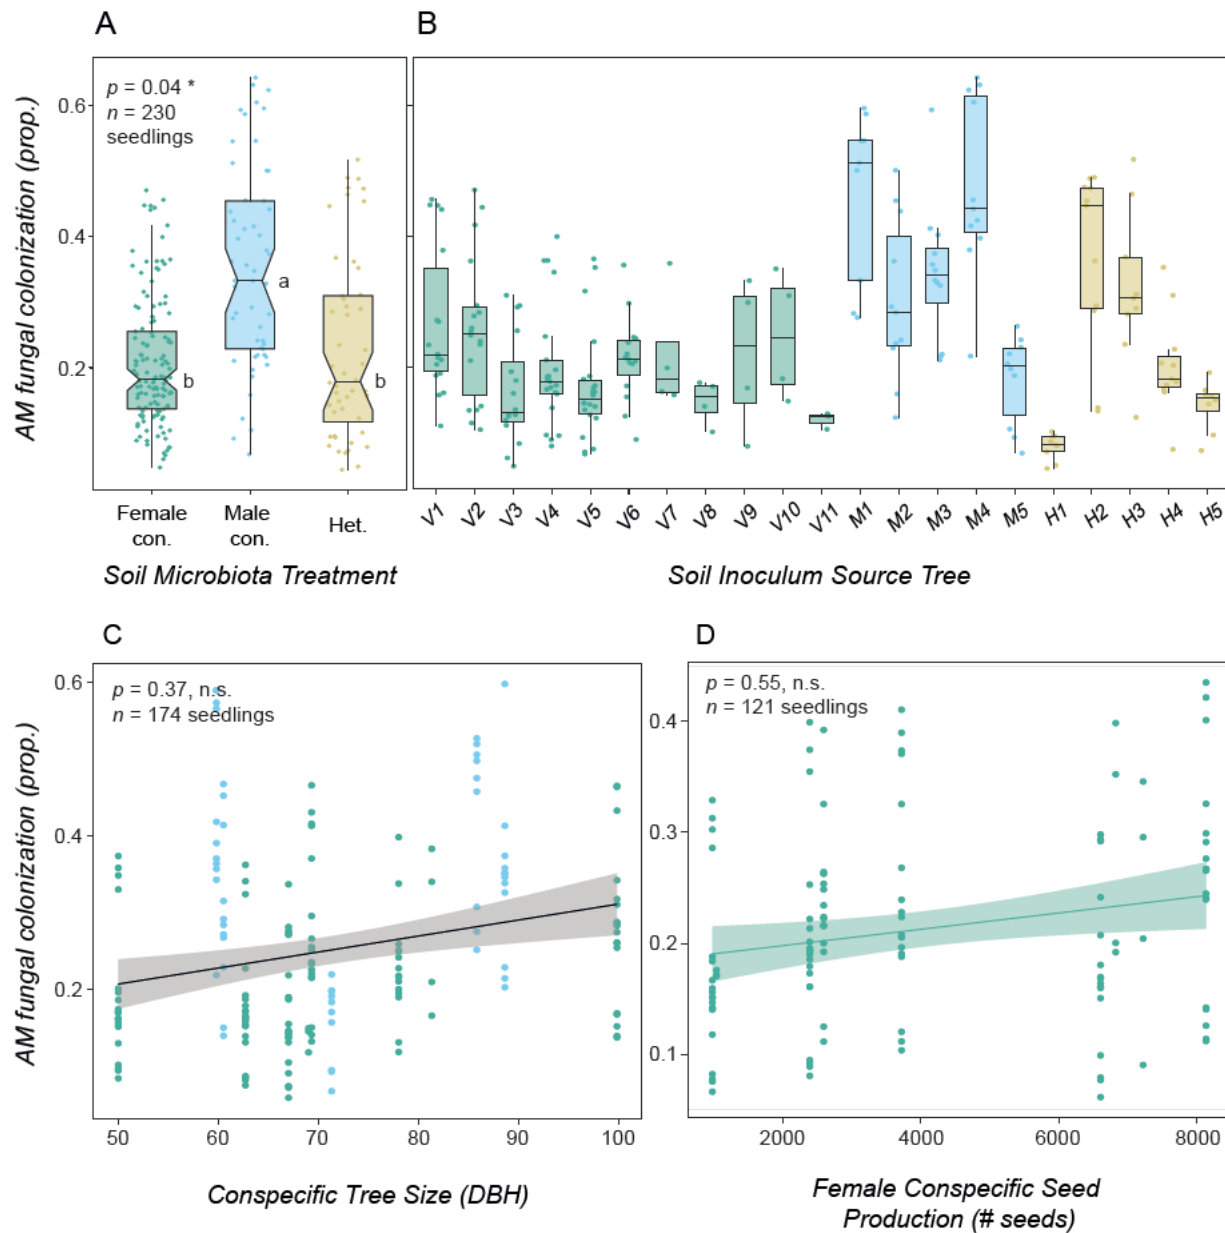

592  
593

594 **Figure 2. Seedling colonization by AM fungi was higher in the soil microbial communities**  
595 **associated with male conspecific trees in a shadehouse experiment.** *Panel A:* At the end of  
596 the 8-mo shadehouse experiment on Barro Colorado Island (Panama), colonization by AM fungi  
597 was higher in *Virola surinamensis* seedlings grown in the soil microbial communities associated  
598 with male conspecific trees relative to seedlings grown in soil microbial communities associated  
599 with female conspecific trees or heterospecific trees (Table S10). *Panel B:* In four of the five  
600 male soil microbial communities tested, the median predicted values for AM fungal colonization  
601 were higher than in any of the 11 female soil microbial communities tested. *Panel C:* At the end  
602 of the shadehouse experiment, AM fungal colonization was similar in seedlings grown in the soil  
603 microbiota from larger and smaller conspecific soil inoculum source trees (Table S11). *Panel D:*

604 AM fungal colonization at the end of the shadehouse experiment was also similar in seedlings  
605 grown in the soil microbiota from female conspecific trees that produced more or less seeds  
606 (Table S12). In *A* & *B*, box belts show the median predicted values, box hinges correspond to the  
607 first and third quartiles, while box whiskers extend to the largest and smallest value no further  
608 than  $1.5 \times$  the interquartile range from the hinges (predicted values are plotted to show patterns  
609 after accounting for covariates). In *A*, box notches represent a 95 % confidence interval for  
610 comparing predicted medians. In *C* & *D*, shaded areas represent 95 % confidence interval bands  
611 surrounding the best fit regression lines.



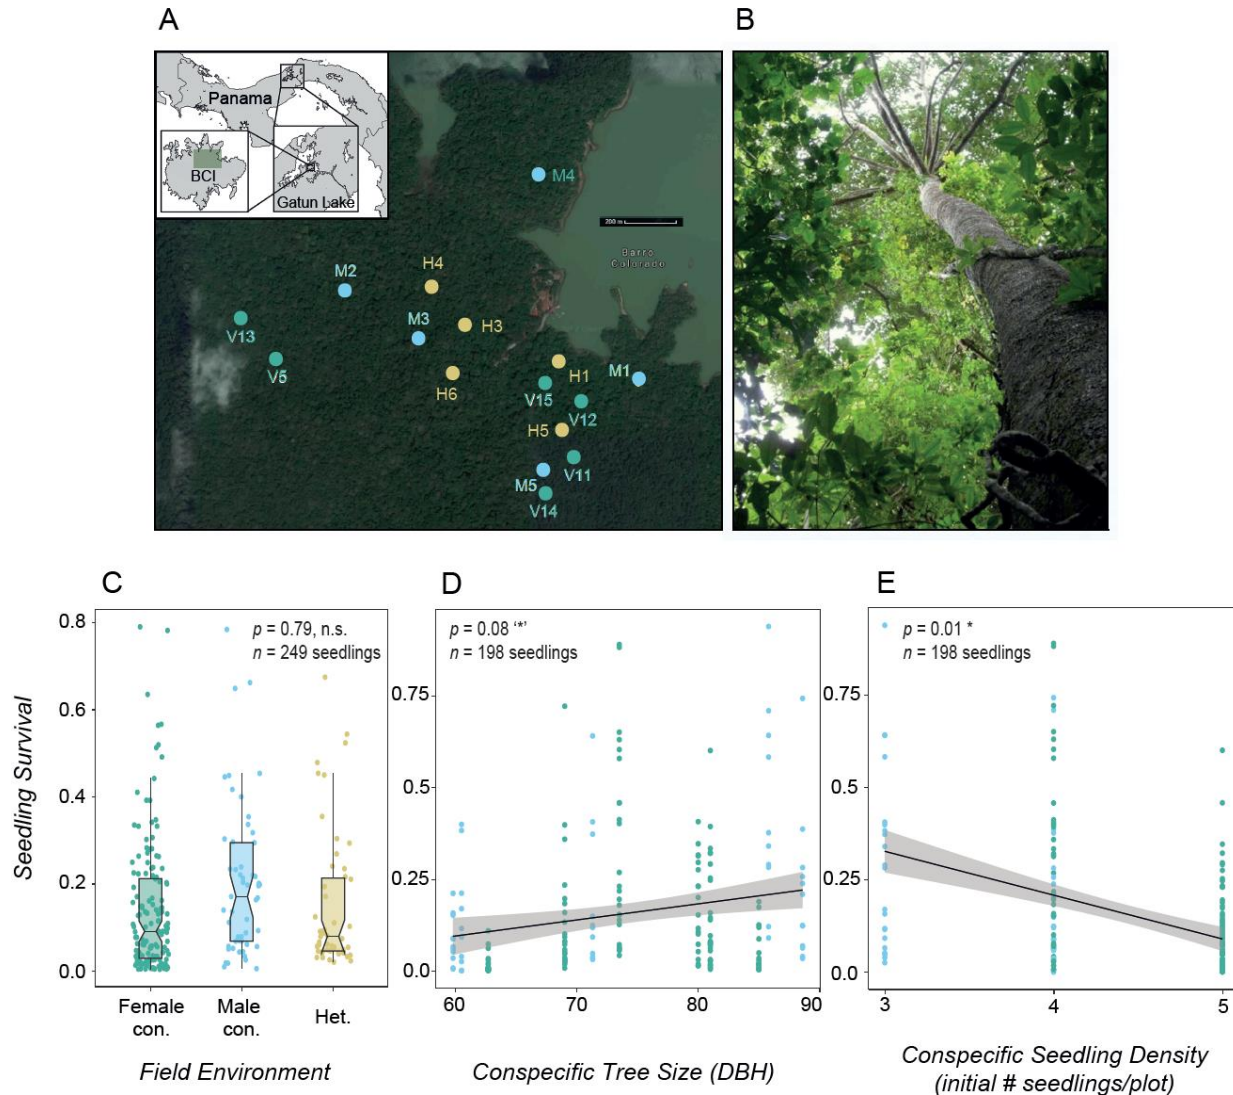

612  
613

614 **Figure 3. In a field experiment, seedling survival was similar in female conspecific and male**  
 615 **conspecific environments but was influenced by other factors.** *Panel A:* *Virola surinamensis*  
 616 and heterospecific trees used as soil inoculum sources in the field experiment are located on  
 617 Barro Colorado Island (BCI), Panama (the study area is shaded in green on the BCI map).  
 618 Female *V. surinamensis* are marked in green (V5, V11 - V15), male *V. surinamensis* in blue (M1  
 619 - M5), and heterospecific trees in yellow (H1, H3 - H6). Map data: Google, ©2017. Map inset  
 620 modified from Baldeck *et al.*, 2014. *Panel B:* In a field experiment on BCI, we planted *V.*  
 621 *surinamensis* seedlings in three field treatments: female conspecific environments, male  
 622 conspecific environments, or heterospecific environments. *Panel C:* At the end of the 7-mo field  
 623 experiment, the survival of *V. surinamensis* seedlings was similar among female conspecific,  
 624 male conspecific, and heterospecific field environments (Table S14). *Panel D:* At the end of the  
 625 field experiment, we found a marginally significant positive effect of the size of the adult  
 626 conspecific tree on the survival of experimental seedlings (Table S15). *Panel E:* In the field  
 627 experiment, seedling survival decreased as the number of experimental conspecific seedlings in  
 628 the field plots increased (Table S15). In C, predicted values are plotted as points, box belts show  
 629 the median predicted values, box notches represent a 95 % confidence interval for comparing



630 predicted medians, box hinges correspond to the first and third quartiles, while box whiskers  
631 extend to the largest and smallest value no further than  $1.5 \times$  the interquartile range from the  
632 hinges. In  $D$  &  $E$ , shaded areas represent 95 % confidence interval bands surrounding the best fit  
633 regression lines.

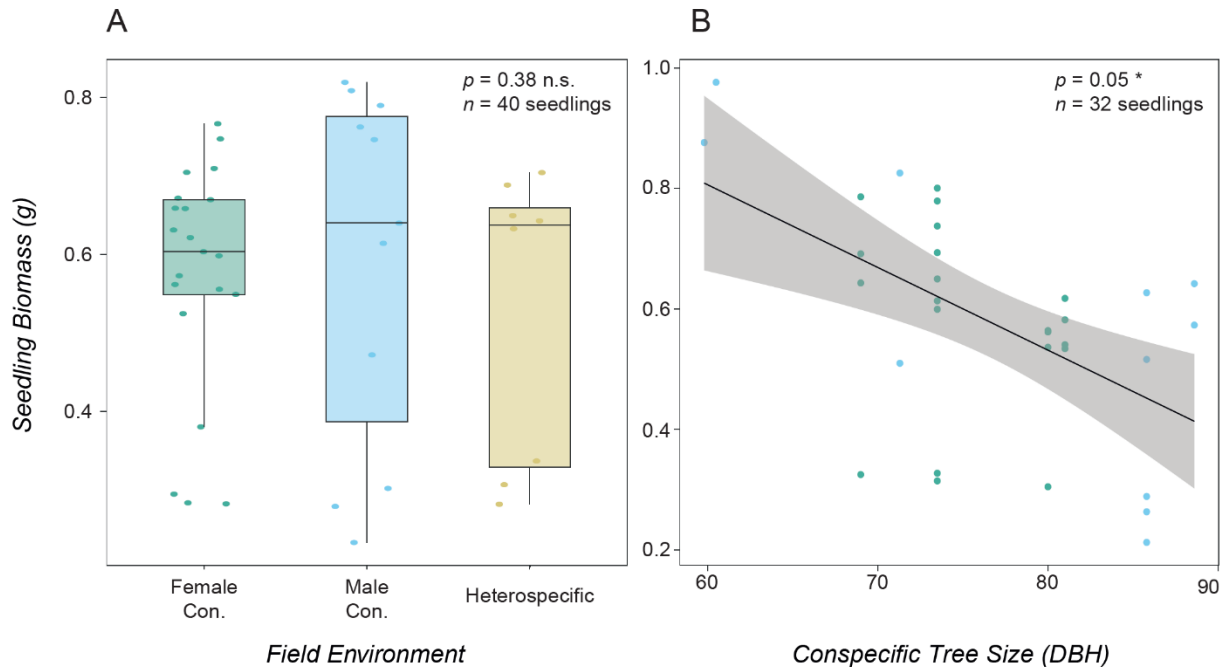

634  
635

636 **Figure 4. In a field experiment, seedling biomass was similar among female conspecific and**  
637 **male conspecific environments but was influenced by tree size. Panel A:** At the end of a 7-mo  
638 field experiment on Barro Colorado Island (Panama), the biomass of the *Virola surinamensis*  
639 seedlings that survived until the end of the experiment was similar among seedlings growing in  
640 female conspecific, male conspecific, and heterospecific field environments (Table S16). *Panel*  
641 *B:* We found a negative effect of conspecific tree size on seedling biomass at the end of the field  
642 experiment (Table S17). In A, predicted values are plotted as points, box belts show the median  
643 predicted values, box notches represent a 95 % confidence interval for comparing predicted  
644 medians, box hinges correspond to the first and third quartiles, while box whiskers extend to the  
645 largest and smallest value no further than  $1.5 \times$  the interquartile range from the hinges. In B, the  
646 shaded area represents 95 % confidence interval bands surrounding the best fit regression line.

647 **Author Contributions**

648 JLE and LSC designed the experiments, with help from SAQ and CSD. JLE, CSD, and  
649 DMW collected the data. JLE, LSC, and SAQ analyzed the data. JLE wrote the first draft of the  
650 manuscript. All authors approved the final version of the manuscript.

651

652 **Acknowledgements**

653 We would like to thank Oris Acevedo, Luis Aguilar, Abdiel Chevarria, Blexein Contreras,  
654 Mitzila Gaitan, Lourdes Hernández, Belkys Jiménez, and Roni Saenz for assistance conducting  
655 the study in Panama and the Soils Lab at the Smithsonian Tropical Research Institute for assistance  
656 in generating the soil nutrient data. Funding was provided by National Science Foundation  
657 Division of Environmental Biology Grants 1457571 and 1457515 to LSC. JLE acknowledges  
658 support from Yale University, The Ohio State University, and a Smithsonian Institute Predoctoral  
659 Fellowship.

660 **References**

- 661 • Aarssen, L. W. & Jordan, C. (2001). Between-species patterns of covariation in plant size,  
662 seed size and fecundity in monocarpic herbs. *Ecoscience* 8(4): 471-477.
- 663 • Adler, F. R., & Muller-Landau, H. C. (2005). When do localized natural enemies increase  
664 species richness? *Ecology Letters* 8, 438-447.
- 665 • Adler, P. B., Smull, D., Beard, K. H., Choi, R. T., Furniss, T., Kulmatiski, A., Meiners, J. M.,  
666 Tredennick, A. T., Veblen, K. E. (2018). Competition and coexistence in plant communities:  
667 intraspecific competition is stronger than interspecific competition. *Ecology Letters* 21(9):  
668 1319-1329.
- 669 • Bachelot, B., Uriarte, M., & McGuire, K. (2015). Interactions among mutualism,  
670 competition, and predation foster species coexistence in diverse communities. *Theoretical*  
671 *Ecology* 8, 297-312.
- 672 • Bachelot, B., Uriarte, M., McGuire, K. L., Thompson, J., & Zimmerman, J. (2017).  
673 Arbuscular mycorrhizal fungal diversity and natural enemies promote coexistence of tropical  
674 tree species. *Ecology* 98(3): 712-720.
- 675 • Baldeck, C. & Asner, G., Martin, R., Anderson, C., Knapp, D., Kellner, J. & Wright, S. J.  
676 (2014). Operational tree species mapping in a diverse tropical forest with airborne imaging  
677 spectroscopy. *PloS one*, 10. 10.1371/journal.pone.0118403.
- 678 • Bates, D., Maechler, M., Bolker, B., & Walker, W. (2015). Fitting linear mixed-effects  
679 models using lme4. *Journal of Statistical Software*, 67(1), 1-48.
- 680 • Bell, T, Freckleton, R. P., & Lewis, O. T. (2006). Plant pathogens drive density-dependent  
681 seedling mortality in a tropical tree. *Ecology Letters* 9, 569-574.
- 682 • Bennett, J. A., Maherali, H., Reinhart, K. O., Lekberg, Y., Hart, M. M., & Klironomos, J.  
683 (2017). Plant-soil feedbacks and mycorrhizal type influence temperate forest population  
684 dynamics. *Science* 355, 181-184.
- 685 • Bever, J. D. (2002). Negative feedback within a mutualism: host-specific growth of  
686 mycorrhizal fungi reduces plant benefit. *Proc. R. Soc. Lond. B* 269, 2595-2601.
- 687 • Brooks, M. E., Kristensen, K., van Benthem, K. J., Magnusson, A., Berg, C. W., Nielsen, A.,  
688 Skaug, H. J., Maechler, M. & Bolker, B. M. (2017). glmmTMB balances speed and

- 689 flexibility among packages for zero-inflated generalized linear mixed modeling. *The R*  
690 *Journal* 9(2), 378-400. doi:10.32614/RJ-2017-066
- 691 • Browne, L., & Karubian, J. (2016). Frequency-dependent selection for rare genotypes  
692 promotes genetic diversity of a tropical palm. *Ecology Letters* 19, 1439-1447.
- 693 • Bruijning, M., Visser, M. D., Muller-Landau, H. C., Wright, S. J., Comita, L. S., Hubbell, S.  
694 P., de Kroon, H., & Jongejans, E. (2017). Surviving in a cosexual world: a cost-benefit  
695 analysis of dioecy in tropical trees. *American Naturalist* 189(3), 297-314.
- 696 • Carson, W. P., Anderson, J. T., Leigh, E. G., & Schnitzer, S. A. (2008). Challenges  
697 associated with testing and falsifying the Janzen-Connell hypothesis: a review and critique.  
698 *Tropical Forest Community Ecology* (eds W. P. Carson & S. A. Schnitzer), pp. 210-241.  
699 Wiley-Blackwell, Chichester, UK.
- 700 • Chanthorn, W., Caughlin, T., Dechkla, S., & Brockelman, W. Y. (2013). The relative  
701 importance of fungal infection, conspecific density and environmental heterogeneity for  
702 seedling survival in a dominant tropical tree. *Biotropica* 45(5), 587-593.
- 703 • Chen, L., Swenson, N. G., Ji, N., Mi, X., Ren, H., Guo, L. & Ma, K. (2019). Differential soil  
704 fungus accumulation and density dependence of trees in a subtropical forest. *Science* 366:  
705 124-128.
- 706 • Chesson, P. (2000). Mechanisms of maintenance of species diversity. *Annual Review of*  
707 *Ecology and Systematics* 31, 343-346.
- 708 • Clark, J. S. (2010). Individuals and the variation needed for high species diversity in forest  
709 trees. *Science* 327, 1129-1132.
- 710 • Comita, L. S., Muller-Landau, H. C., Aguilar, S., & Hubbell, S. P. (2010). Asymmetric  
711 density dependence shapes species abundances in a tropical tree community. *Science* 329,  
712 330-332.
- 713 • Comita, L. S., Queenborough, S. A., Murphy, S. J., Eck, J. L., Xu, K., Krishnadas, M.,  
714 Beckman, N., & Zhu, Y. (2014). Testing predictions of the Janzen-Connell hypothesis: a  
715 meta-analysis of experimental evidence for distance-dependent and density-dependent seed  
716 and seedling survival. *Journal of Ecology* 102, 845-856.
- 717 • Comita, L.S. & Stump, S. M. (2020). Natural enemies and the maintenance of tropical tree  
718 diversity: recent insights and implications for the future of biodiversity in a changing world.  
719 *Annals of the Missouri Botanical Garden* 105(3), 377-392.

- 720 • Condit, R., Ashton, P. S., Baker, P., Bunyavejchewin, S., Gunatilleke, S., Gunatilleke, N.,  
721 Hubbell, S. P., Foster, R. B., Itoh, A., LaFrankie, J. V., Lee, H. S., Losos, E., Manokaran, N.,  
722 Sukumar, R., & Yamakura, T. (2000). Spatial patterns in the distribution of tropical tree  
723 species. *Science*, 288, 1414-1418.
- 724 • Connell, J. H. (1971). On the role of natural enemies in preventing competitive exclusion in  
725 some marine animals and in rain forest trees. *Dynamics of Populations* (eds. den Boer, P. J.  
726 & Gradwell, G. R.) 298-312, Center for Agricultural Publication and Documentation,  
727 Wageningen.
- 728 • Croat, T. B. (1978). *Flora of Barro Colorado Island*. Stanford University Press, Stanford, CA,  
729 USA.
- 730 • Delavaux, C. S., Smith-Ramesh, L. M. & Kuebbing, S. E. (2017). Beyond nutrients: a meta-  
731 analysis of the diverse effects of mycorrhizal fungi on plants and soils. *Ecology* 98(8), 2111-  
732 2119.
- 733 • Eck, J. L., Stump, S. M., Delavaux, C. S., Mangan, S. A., & Comita, L. S. (2019). Evidence  
734 of within-species specialization by soil microbes and the implications for plant community  
735 diversity. *PNAS* 116(15): 7371-7376.
- 736 • Fisher, B. L., Howe, H. F., & Wright, S. J. (1991). Survival and growth of *Virola*  
737 *surinamensis* yearlings: water augmentation in gap and understory. *Oecologia*, 86(2), 292-  
738 297.
- 739 • Fox, J. & Weisberg, S. (2019). *An R Companion to Applied Regression*, Third Edition.  
740 Thousand Oaks, CA: Sage. URL: <https://socialsciences.mcmaster.ca/jfox/Books/Companion/>
- 741 • Freckleton, R. P. & Lewis, O. T. (2006). Pathogens, density dependence and the coexistence  
742 of tropical trees. *Proceedings: Biological Sciences* 273(1604), 2909-2916.
- 743 • Harms, K. E., Wright, S. J., Calderon, O. Hernandez, A., & Herre, E. A. (2000). Pervasive  
744 density-dependent recruitment enhances seedling diversity in a tropical forest. *Nature* 404,  
745 494-495.
- 746 • Harms, K. E., Condit, R., Hubbell, S. P., & Foster, R. B. (2001). Habitat associations of trees  
747 and shrubs in a 50-ha neotropical forest plot. *Journal of Ecology*, 89, 947-959.
- 748 • Hood, L. A., Swaine, M. D., & Mason, P. A. (2004). The influence of spatial patterns of  
749 damping-off disease and arbuscular mycorrhizal colonization on tree seedling establishment  
750 in Ghanaian tropical forest soil. *Journal of Ecology* 92, 816-823.

- 751 • Howe, H. F. (1990). Survival and growth of juvenile *Virola surinamensis* in Panama: effects  
752 of herbivory and canopy closure. *Journal of Tropical Ecology*, 6(3), 259-280.
- 753 • Howe, H. F. & Vande Kerckhove, G. A. (1981). Removal of wild nutmeg (*Virola*  
754 *surinamensis*) crops by birds. *Ecology*, 62(4), 1093-1106.
- 755 • Hubbell, S.P. (1980). Seed predation and the coexistence of tree species in tropical forests.  
756 *Oikos*, 35, 214–229.
- 757 • Hülsmann, L., Chisholm, R., & Hartig, F. (2021). Is variation in conspecific negative density  
758 dependence driving tree diversity patterns at large scales? *Trends Ecol. Evol.*, 36(2), 151-  
759 163.
- 760 • Janzen, D. H. (1970). Herbivores and the number of tree species in tropical forests. *American*  
761 *Naturalist* 104, 501-528.
- 762 • Jardim, M. A. G. & da Mota, C. G. (2007). *Virola surinamensis* (Rol.) Warb. (Myristicaceae)  
763 floral biology. *Revista Arvore*, 31(6), <https://doi.org/10.1590/S0100-67622007000600020>
- 764 • Jevon, F. V., De La Cruz, D., LaManna, J. A., Lang, A. K., Orwig, D. A., Record, S., Kouba,  
765 P. V., Ayres, M. P. & Matthes, J. H. (2022). Experimental and observational evidence of  
766 negative conspecific density dependence in temperate ectomycorrhizal trees. *Ecology*  
767 103(11):e3808. doi: 10.1002/ecy.3808
- 768 • Jia, S., Wang, X., Yuan, Z., Lin, F., Ye, J., Lin, G., Hao, Z. & Bagchi, R. (2020). Tree  
769 species traits affect which natural enemies drive the Janzen-Connell effect in a temperate  
770 forest. *Nature Communications* 11(286). <https://doi.org/10.1038/s41467-019-14140-y>
- 771 • Jiang, F., Zhu, K., Cadotte, M. W., & Jin, G. (2020). Tree mycorrhizal type mediates the  
772 strength of negative density dependence in temperate forests. *Journal of Ecology*  
773 108(6):2601-2610.
- 774 • Kobe, R.K. & Vriesendorp, C.F. (2011). Conspecific density dependence in seedlings varies  
775 with species shade tolerance in a wet tropical forest. *Ecol. Lett.*, 14, 503–510.
- 776 • Kotanen, P. M. (2010). Effects of fungal seed pathogens under conspecific and heterospecific  
777 trees in a temperate forest. *Can. J. Bot.* 85, 918-925.
- 778 • Kuznetsova, A., Brockhoff, P. B., & Christensen, R. H. B. (2016). lmerTest: Tests in linear  
779 mixed effects models. R package version 2.0-33. [https://CRAN.R-](https://CRAN.R-project.org/package=lmerTest)  
780 [project.org/package=lmerTest](https://CRAN.R-project.org/package=lmerTest)

- 781 • Lebrija-Trejos, E., Wright, S. J., Hernández, A., & Reich, P. B. (2014). Does relatedness  
782 matter? Phylogenetic density-dependent survival of seedlings in a tropical forest. *Ecology*  
783 95(4), 940-951.
- 784 • Lebrija-Trejos, E., Reich, P. B., Hernández, A. & Wright, S. J. (2016). Species with greater  
785 seed mass are more tolerant of conspecific neighbors: a key driver of early survival and  
786 future abundances in a tropical forest. *Ecology Letters*, 19(9), 1071-1080.
- 787 • Liang, M., Liu, X., Etienne, R. S., Huang, F., Wang, Y., & Yu, S. (2015). Arbuscular  
788 mycorrhizal fungi counteract the Janzen-Connell effect of soil pathogens. *Ecology* 96(2),  
789 562-574.
- 790 • Liang, M., Liu, X., Gilbert, G. S., Zheng, Y., Luo, S., Huang, F., & Yu, S. (2016). Adult trees  
791 cause density-dependent mortality in conspecific seedlings by regulating the frequency of  
792 pathogenic soil fungi. *Ecology Letters* 19, 1448-1456.
- 793 • Liu, X., Liang, M., Etienne, R. S., Wang, Y., Staehelin, S., & Yu, S. (2012). Experimental  
794 evidence for a phylogenetic Janzen-Connell effect in a subtropical forest. *Ecology Letters* 15,  
795 111-118.
- 796 • Liu, X., Etienne, R. S., Liang, M., Wang, Y., Yu, S. (2015). Experimental evidence for an  
797 intraspecific Janzen-Connell effect mediated by soil biota. *Ecology* 96(3), 662-671.
- 798 • Mangan, S. A., Herre, E. A., & Bever, J. D. (2010a). Specificity between Neotropical tree  
799 seedlings and their fungal mutualists leads to plant-soil feedback. *Ecology* 91(9), 2594-2603.
- 800 • Mangan, S. A., Schnitzer, S. A., Herre, E. A., Mack, K. M. L., Valencia, M. C., Sanchez, E.  
801 I., & Bever, J. D. (2010b). Negative plant-soil feedback predicts tree-species relative  
802 abundance in a tropical forest. *Nature* 466, 752-755.
- 803 • Marden, J. H., Mangan, S. A., Peterson, M. P., Wafula, E., Fescemyer, H. W., Der, J. P.,  
804 DePamphilis, C. W., & Comita, L. S. (2017). Ecological genomics of tropical trees: how  
805 local population size and allelic diversity of resistance genes relate to immune responses,  
806 cosusceptibility to pathogens, and negative density dependence. *Molecular Ecology* doi:  
807 10.1111/mec.13999
- 808 • McCarthy-Neumann, S., & Ibáñez, I. (2013). Plant-soil feedback links negative distance  
809 dependence and light gradient partitioning during seedling establishment. *Ecology* 94(4),  
810 780-786.



- 811 • McGonigle, T. P., Miller, M. H., Evans, D. G., Fairchild, G. L., & Swan, J. A. (1990). A new  
812 method which gives an objective measure of colonization of roots by vesicular-arbuscular  
813 mycorrhizal fungi. *New Phytologist*, 115, 495-495.
- 814 • Metz, M. R., Sousa, W. P., & Valencio, R. (2010). Widespread density-dependent seedling  
815 mortality promotes species coexistence in a highly diverse Amazonian rain forest. *Ecology*  
816 91(12), 3675-3685.
- 817 • Montesinos, D., Verdú, M., & García-Fayos, P. (2007). Moms are better nurses than dads:  
818 gender biased self-facilitation in a dioecious *Juniperus* tree. *Journal of Vegetation Science*  
819 18, 271-280.
- 820 • Newsham, K. K., Fitter, A. H., & Watkinson, A. R. (1995). Arbuscular mycorrhiza protect an  
821 annual grass from root pathogenic fungi in the field. *Journal of Ecology* 83, 991-1000.
- 822 • Packer, A. & Clay, K. (2003). Soil pathogens and *Prunus serotina* seedling and sapling  
823 growth near conspecific trees. *Ecology*, 84(1), 108-119.
- 824 • Paine, C. E., Harms, K. E., Schnitzer, S. A. & Carson, W. P. (2008). Weak competition  
825 among tropical tree seedlings: implications for species coexistence. *Biotropica* 40(4), 432-  
826 440.
- 827 • Piao, T., Comita, L.S., Jin, G. & Kim, J.H. (2013). Density dependence across multiple life  
828 stages in a temperate old-growth forest of northeast China. *Oikos*, 172, 107–117.
- 829 • Pozo, M. J. & Azcón-Aguilar, C. (2007). Unraveling mycorrhiza-induced resistance. *Current*  
830 *Opinion in Plant Biology* 10, 393-398.
- 831 • Pujol, B. & Mckey, D. (2006). Size asymmetry in intraspecific competition and the density-  
832 dependence of inbreeding depression in a natural plant population: a case study in cassava  
833 (*Manihot esculenta* Crantz, Euphorbiaceae). *Journal of Evolutionary Biology* 19(1): 85-96.
- 834 • Queenborough, S. A., Burslem, D. F. R. P., Garwood, N. C., & Valencia, R. (2007a).  
835 Neighborhood and community interactions determine the spatial pattern of tropical tree  
836 seedling survival. *Ecology*, 88(9), 2248-2258.
- 837 • Queenborough, S. A., Burslem, D. F. R. P., Garwood, N. C. & Valencia, R. (2007b).  
838 Determinants of biased sex ratios and inter-sex costs of reproduction in dioecious tropical  
839 forest trees. *American Journal of Botany* 94(1), 67-78.
- 840 • R Core Team (2022). R: A language and environment for statistical computing. R  
841 Foundation for Statistical Computing, Vienna, Austria. <https://www.R-project.org/>.

- 842 • Reinhart, K. O., & Clay, K. (2009). Spatial variation in soil-borne disease dynamics of a  
843 temperate tree, *Prunus serotina*. *Ecology* 90(11), 2984-2993.
- 844 • Riba-Hernández, P., Segura, J. L., Fuchs, E. J., & Moreira, J. (2014). Population and genetic  
845 structure of two dioecious timber species *Virola surinamensis* and *Virola koschnyi*  
846 (Myristicaceae) in southwestern Costa Rica. *Forest Ecology and Management*, 323, 168-176.
- 847 • Ronsheim, M. L., & Anderson, S. E. (2001). Population-level specificity in the plant-  
848 mycorrhizae association alters intraspecific interactions among neighboring plants.  
849 *Oecologia* 128, 77-84.
- 850 • Schupp, E.W. (1992). The Janzen–Connell model for tropical tree diversity: population  
851 implications and the importance of spatial scale. *Am. Nat.*, 140, 526–530.
- 852 • Smith, S. E., & Read, D. J. (2008). Mycorrhizal symbiosis. Third edition. Academic,  
853 London, UK.
- 854 • Song, X., Zhang, W., Johnson, D. J., Yang, J., Asefa, M., Deng, X., Yang, X. & Cao, M.  
855 (2020). Conspecific negative density dependence in rainy season enhanced seedling diversity  
856 across habitats in a tropical forest. *Oecologia* 193(4):949-957.
- 857 • Stump, S. M. & Comita, L. S. (2018). Interspecific variation in conspecific negative density  
858 dependence can make species less likely to coexist. *Ecology Letters* 21: 1541-1551.
- 859 • Swamy, V., Terborgh, J., Dexter, K.G., Best, B.D., Alvarez, P. & Cornejo, F. (2011). Are all  
860 seeds equal? Spatially explicit comparisons of seed fall and sapling recruitment in a tropical  
861 forest. *Ecol. Lett.*, 14, 195–201.
- 862 • Suzuki, R. O., Kudoh, H., & Kachi, N. (2003). Spatial and temporal variations in mortality of  
863 the biennial plant, *Lysimachi rubida*: effects of intraspecific competition and environmental  
864 heterogeneity. *Journal of Ecology* 91: 114-125.
- 865 • Uriarte, M., Canham, C. D., Thompson, J. & Zimmerman, J. K. (2004). A neighborhood  
866 analysis of tree growth and survival in a hurricane-driven tropical forest. *Ecological*  
867 *Monographs* 74(4): 591-614.
- 868 • Windsor, D. M. (1990). Climate and moisture variability in a tropical forest: long-term  
869 records from Barro Colorado Island, Panamá. *Smithsonian Contributions to the Earth*  
870 *Sciences*, 29, 1-145.

- 871 • Wright, S. J., Muller-Landau, H. C., Calderon, O. & Hernandez, A. (2005). Annual and  
872 spatial variation in seedfall and seedling recruitment in a Neotropical forest. *Ecology* 86(4),  
873 848-860.
- 874 • Zimmerman, J. K., Wright, S. J., Calderón, O., Pagan, M. A. & Paton, S. (2007). Flowering  
875 and fruiting phenologies of seasonal and aseasonal neotropical forests: the role of annual  
876 changes in irradiance. *Journal of Tropical Ecology*, 23, 231-251.
- 877 • Zang, L., Xu, H., Li, Y. & Zang, R. (2021). Conspecific negative density dependence of trees  
878 varies with plant functional traits and environmental conditions across scales in a 60-ha  
879 tropical rainforest dynamics plot. *Biotropica* 53(2): 693-702.
- 880 • Zhu, Y., Comita, L.S. & Hubbell, S.P. (2015). Conspecific and phylogenetic density-  
881 dependent survival differs across life stages in a tropical forest. *J. Ecol.*, 103, 957–966.
- 882 • Zhu, Y., Queenborough, S. A., Condit, R., Hubbell, S. P., Ma, K. P. & Comita, L. S. (2018).  
883 Density-dependent survival varies with species life-history strategy in a tropical forest.  
884 *Ecology Letters* 21(4): 506-515.
